# Supplementary material
Source: publisher site journal article supplement (https://www.dovepress.com/article/452679)
Supplement: Supplementary file 1 [file get_supplementary_file.php]

**Online Supplementary Material**

*Of the manuscript:* Bagepally et al·, Evaluating Health Expenditure Trends and Disease Burden in India: A Cost per DALY Approach

**Contents**

Supplementary Figure 1: Cost per DALY to GSDP ratio in India ···················· Page 1

Supplementary Table 1: Cost per DALY in India ···················· Page 2

Appendix 1 ···················· Page 3-5

Supplementary Figure 1: Cost per DALY to GSDP ratio in India


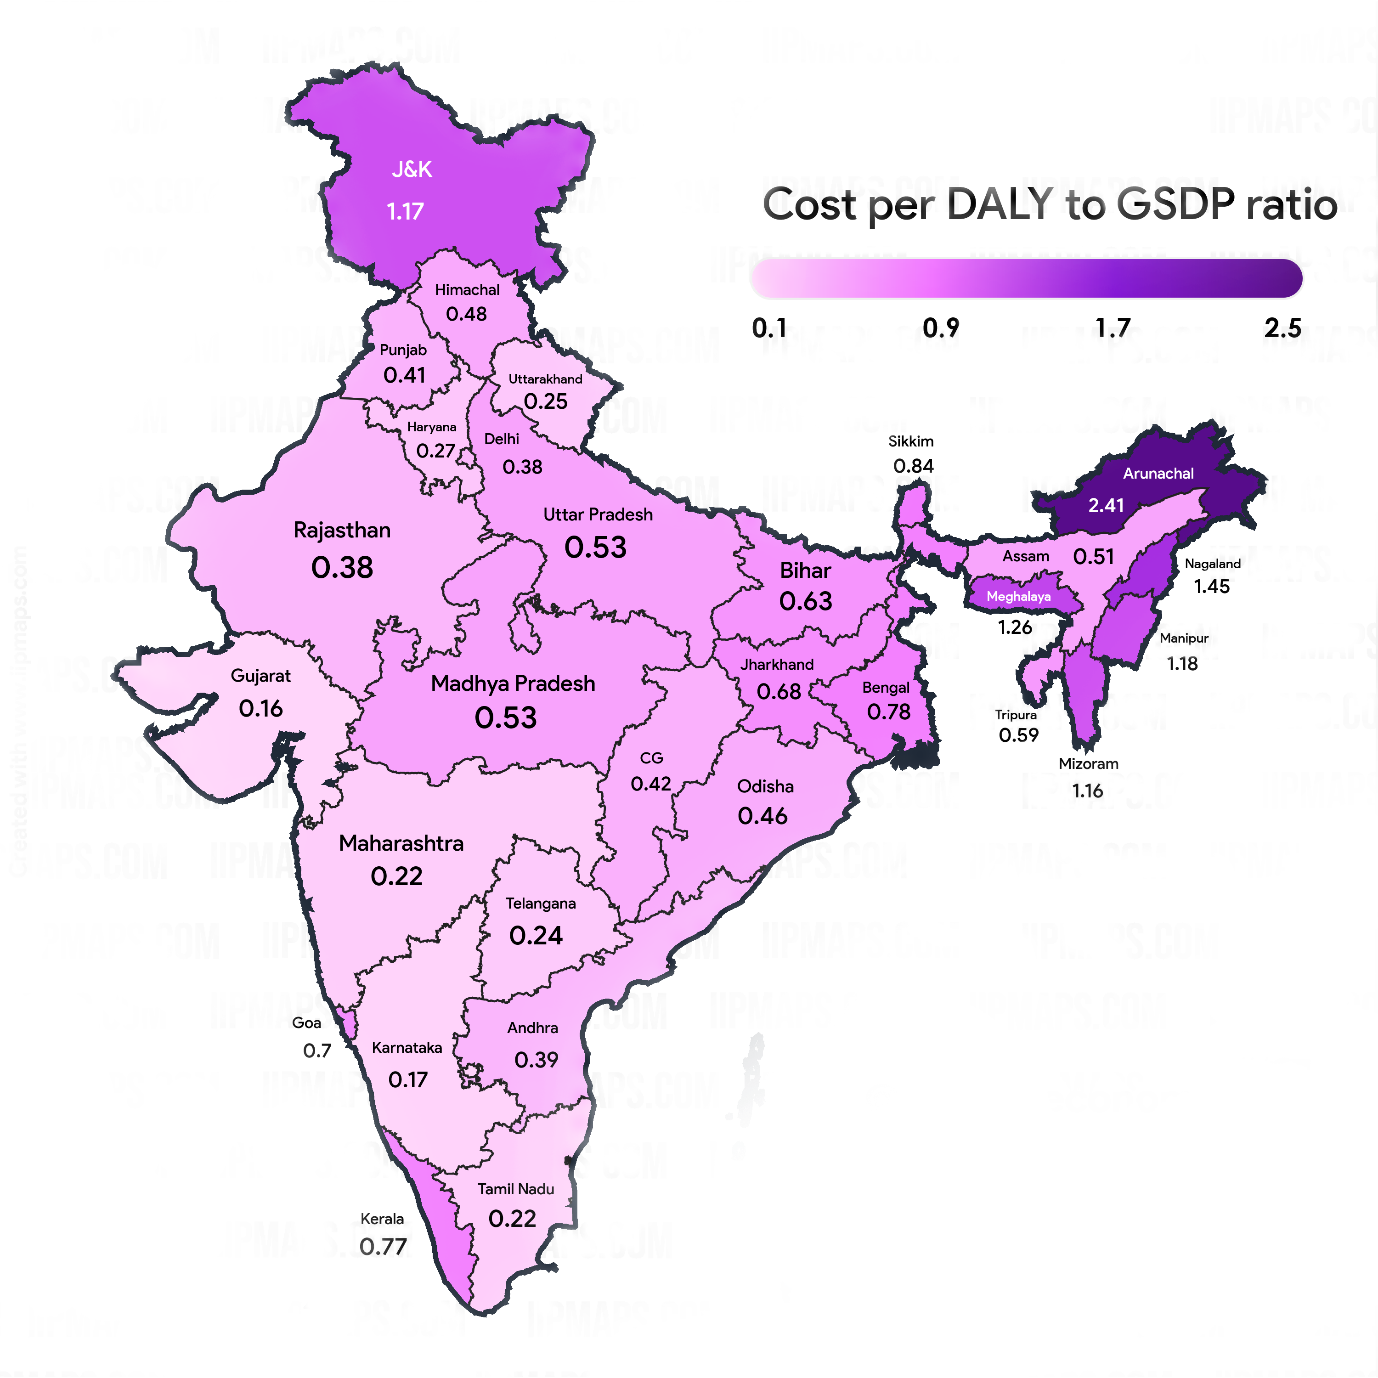


[The figure displays the estimated cost per DALY to GSDP ratio for individual states in India. States with lighter colors indicate a lower value, while darker blue represents a higher value.]

Supplementary Table 1: Cost per DALY in India

| State | HDI 2019 | HDI Quartiles | OOPE  (% to THE) | Cost per DALY  (Overall) | | Cost per DALY (based on HDI Quartiles) | | Cost per DALY to  GSDP ratio |
| --- | --- | --- | --- | --- | --- | --- | --- | --- |
| In Rupees | In US $ | In Rupees | In US $ |
| Andhra Pradesh | 0.649 | Q2_HDI | 0.63 | 50094 | 608 | 62908 | 763 | 0.39 |
| Arunachal Pradesh | 0.661 | Q2_HDI | 0.48* | 287058 | 3484 | 360488 | 4375 | 2.41 |
| Assam | 0.613 | Q1_HDI | 0.37 | 35228 | 428 | 27451 | 333 | 0.51 |
| Bihar | 0.574 | Q1_HDI | 0.54 | 21463 | 260 | 16725 | 203 | 0.63 |
| Chhattisgarh | 0.611 | Q1_HDI | 0.38 | 36620 | 444 | 28536 | 346 | 0.42 |
| Delhi | 0.746 | Q4_HDI | 0.48* | 117194 | 1422 | 243106 | 2950 | 0.38 |
| Goa | 0.763 | Q4_HDI | 0.48* | 242626 | 2944 | 503300 | 6108 | 0.7 |
| Gujarat | 0.672 | Q2_HDI | 0.41 | 29981 | 364 | 37650 | 457 | 0.16 |
| Haryana | 0.708 | Q3_HDI | 0.47 | 53307 | 647 | 57402 | 697 | 0.27 |
| Himachal Pradesh | 0.725 | Q4_HDI | 0.46 | 79960 | 970 | 165868 | 2013 | 0.48 |
| Jammu & Kashmir | 0.688 | Q3_HDI | 0.45 | 105352 | 1279 | 113445 | 1377 | 1.17 |
| Jharkhand | 0.598 | Q1_HDI | 0.64 | 43196 | 524 | 33660 | 408 | 0.68 |
| Karnataka | 0.683 | Q3_HDI | 0.33 | 29355 | 356 | 31610 | 384 | 0.17 |
| Kerala | 0.782 | Q4_HDI | 0.69 | 125072 | 1518 | 259447 | 3149 | 0.77 |
| Madhya Pradesh | 0.603 | Q1_HDI | 0.56 | 37227 | 452 | 29009 | 352 | 0.53 |
| Maharashtra | 0.697 | Q3_HDI | 0.48 | 38842 | 471 | 41826 | 508 | 0.22 |
| Manipur | 0.697 | Q3_HDI | 0.48* | 78338 | 951 | 84355 | 1024 | 1.18 |
| Meghalaya | 0.656 | Q2_HDI | 0.48* | 98457 | 1195 | 123642 | 1501 | 1.26 |
| Mizoram | 0.704 | Q3_HDI | 0.48* | 175246 | 2127 | 188708 | 2290 | 1.16 |
| Nagaland | 0.679 | Q2_HDI | 0.48* | 122026 | 1481 | 153241 | 1860 | 1.45 |
| Odisha | 0.605 | Q1_HDI | 0.53 | 42993 | 522 | 33502 | 407 | 0.46 |
| Punjab | 0.724 | Q4_HDI | 0.66 | 57340 | 696 | 118945 | 1444 | 0.41 |
| Rajasthan | 0.628 | Q1_HDI | 0.45 | 33688 | 409 | 26251 | 319 | 0.38 |
| Sikkim | 0.717 | Q4_HDI | 0.48* | 248984 | 3022 | 516489 | 6268 | 0.84 |
| Tamil Nadu | 0.709 | Q4_HDI | 0.44 | 37153 | 451 | 77071 | 935 | 0.22 |
| Telangana | 0.669 | Q2_HDI | 0.48 | 41930 | 509 | 52656 | 639 | 0.24 |
| Tripura | 0.658 | Q2_HDI | 0.48* | 59232 | 719 | 74383 | 903 | 0.59 |
| Uttar Pradesh | 0.594 | Q1_HDI | 0.71 | 27369 | 332 | 21327 | 259 | 0.53 |
| Uttarakhand | 0.683 | Q3_HDI | 0.36 | 44934 | 545 | 48386 | 587 | 0.25 |
| West Bengal | 0.641 | Q2_HDI | 0.69 | 63083 | 766 | 79220 | 961 | 0.78 |

*National Average.

DALY- disability adjusted life years; HDI- human development index; OOPE- out-of-pocket expenditure; THE-total health expenditure; GSDP- gross state domestic product; Q1-Quartile 1; Q2-Quartile 2; Q3-Quartile 3; Q4-Quartile 4

# Appendix 1- CHEERS 2022 Checklist

| **Topic** | **No.** | **Item** | **Location where item is reported** |
| --- | --- | --- | --- |
| **Title** | | | |
|  | 1 | Identify the study as an economic evaluation and specify the interventions being compared. | NA |
| **Abstract** | | | |
|  | 2 | Provide a structured summary that highlights context, key methods, results, and alternative analyses. | Page 2, lines 40-58 |
| **Introduction** |  |  |  |
| **Background and objectives** | 3 | Give the context for the study, the study question, and its practical relevance for decision making in policy or practice. | Page 3-4, Lines 87-102 |
| **Methods** | | | |
| **Health economic analysis plan** | 4 | Indicate whether a health economic analysis plan was developed and where available. | NA |
| **Study population** | 5 | Describe characteristics of the study population (such as age range, demographics, socioeconomic, or clinical characteristics). | NR |
| **Setting and location** | 6 | Provide relevant contextual information that may influence findings. | Page 5, lines 120-128 |
| **Comparators** | 7 | Describe the interventions or strategies being compared and why chosen. | NA |
| **Perspective** | 8 | State the perspective(s) adopted by the study and why chosen. | NA |
| **Time horizon** | 9 | State the time horizon for the study and why appropriate. | Page 4, lines 105-106 |
| **Discount rate** | 10 | Report the discount rate(s) and reason chosen. | NA |
| **Selection of outcomes** | 11 | Describe what outcomes were used as the measure(s) of benefit(s) and harm(s). | Page 4, lines 105-122 |
| **Measurement of outcomes** | 12 | Describe how outcomes used to capture benefit(s) and harm(s) were measured. | Page 5-6, lines 142-163 |
| **Valuation of outcomes** | 13 | Describe the population and methods used to measure and value outcomes. | Page 5-6, lines 142-163 |
| **Measurement and valuation of resources and costs** | 14 | Describe how costs were valued. | NA |
| **Currency, price date, and conversion** | 15 | Report the dates of the estimated resource quantities and unit costs, plus the currency and year of conversion. | Page 7, lines 169-171 |
| **Rationale and description of model** | 16 | If modelling is used, describe in detail and why used. Report if the model is publicly available and where it can be accessed. | NA |
| **Analytics and assumptions** | 17 | Describe any methods for analysing or statistically transforming data, any extrapolation methods, and approaches for validating any model used. | NA |
| **Characterising heterogeneity** | 18 | Describe any methods used for estimating how the results of the study vary for subgroups. | Page 5, lines 129-135 |
| **Characterising distributional effects** | 19 | Describe how impacts are distributed across different individuals or adjustments made to reflect priority populations. | NA |
| **Characterising uncertainty** | 20 | Describe methods to characterise any sources of uncertainty in the analysis. | NR |
| **Approach to engagement with patients and others affected by the study** | 21 | Describe any approaches to engage patients or service recipients, the general public, communities, or stakeholders (such as clinicians or payers) in the design of the study. | NA |
| **Results** | | | |
| **Study parameters** | 22 | Report all analytic inputs (such as values, ranges, references) including uncertainty or distributional assumptions. | Page 7,8,9 Lines, lines 184-231 |
| **Summary of main results** | 23 | Report the mean values for the main categories of costs and outcomes of interest and summarise them in the most appropriate overall measure. | Page 7,8,9 Lines, lines 184-231 |
| **Effect of uncertainty** | 24 | Describe how uncertainty about analytic judgments, inputs, or projections affect findings. Report the effect of choice of discount rate and time horizon, if applicable. | NR |
| **Effect of engagement with patients and others affected by the study** | 25 | Report on any difference patient/service recipient, general public, community, or stakeholder involvement made to the approach or findings of the study | NA |
| **Discussion** | | | |
| **Study findings, limitations, generalisability, and current knowledge** | 26 | Report key findings, limitations, ethical or equity considerations not captured, and how these could affect patients, policy, or practice. | Page 9-14, lines -361 |
| **Other relevant information** | | | |
| **Source of funding** | 27 | Describe how the study was funded and any role of the funder in the identification, design, conduct, and reporting of the analysis | Page 15, lines 386 |
| **Conflicts of interest** | 28 | Report authors conflicts of interest according to journal or International Committee of Medical Journal Editors requirements. | Page 15, lines 381-383 |

*NA- Not applicable, NR- Not reported*

*Source:* Husereau D, Drummond M, Augustovski F, et al. Consolidated Health Economic Evaluation Reporting Standards 2022 (CHEERS 2022) Explanation and Elaboration: A Report of the ISPOR CHEERS II Good Practices Task Force. Value Health 2022;25. <doi:10.1016/j.jval.2021.10.008>
